# Supplementary material for: Two New Lanostane Triterpenoids from the Branches and Leaves of Polyalthia oblique
Source: PubMed Central journal article supplement (PMC6271888; doi:10.3390/molecules19067621), 2014-06-06

# Supporting Information

Figure S1. IR spectrum of compound 1.

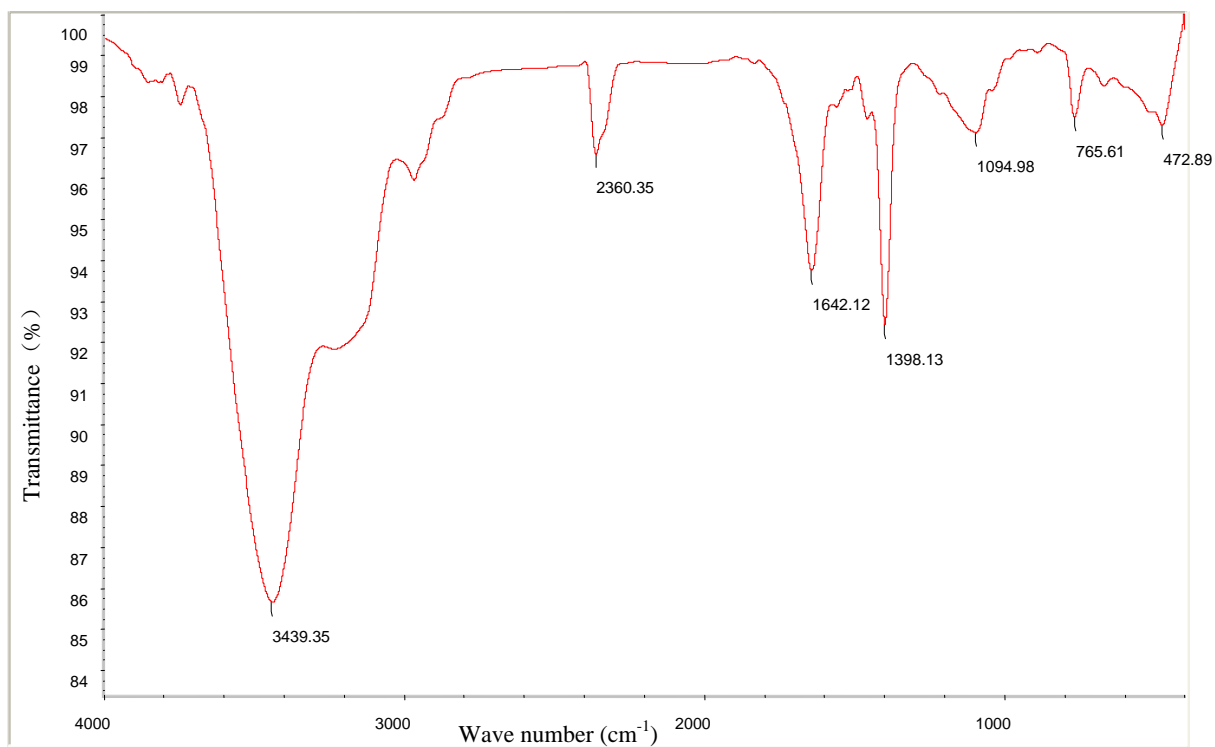

Figure S2. <sup>1</sup>H-NMR (400 MHz, CDCl<sub>3</sub>) spectrum of compound 1.

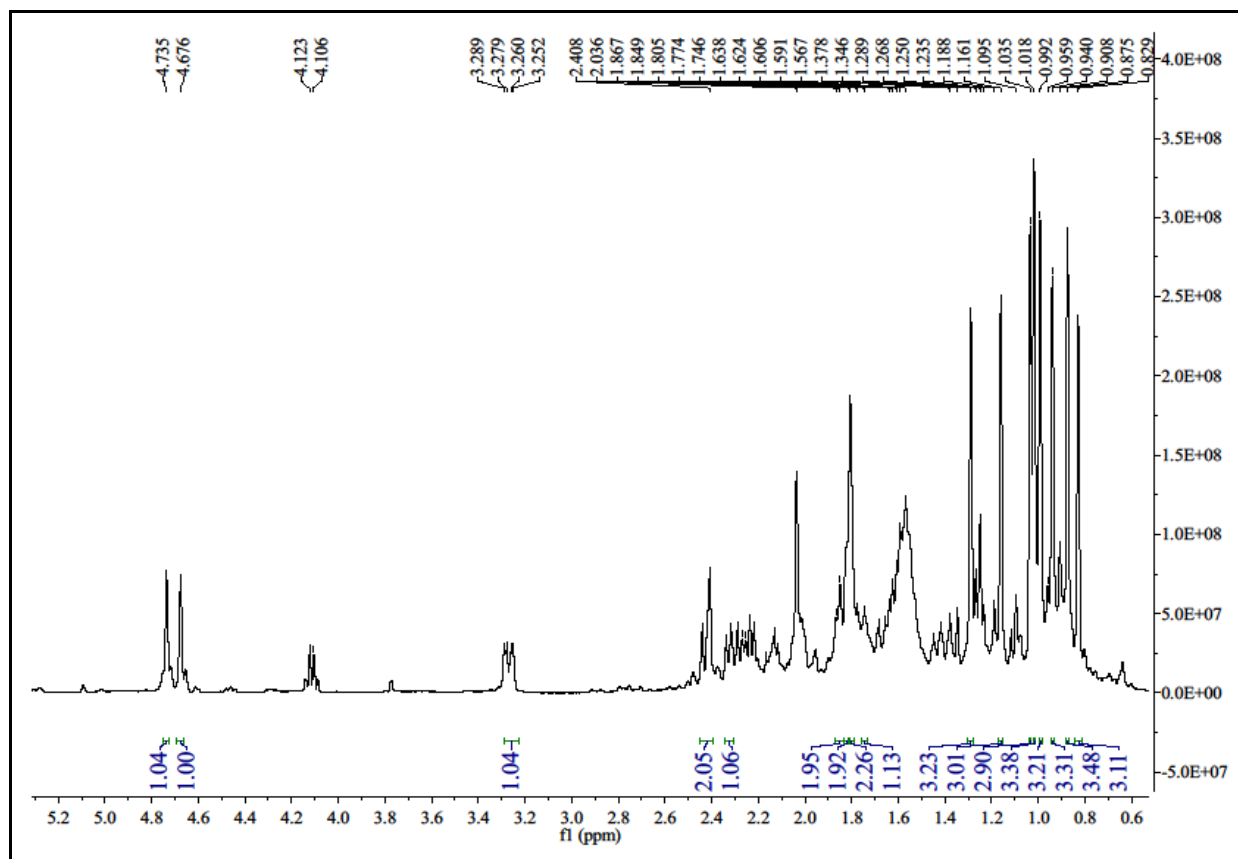

**Figure S3.**  $^{13}\text{C}$ -NMR (100 MHz,  $\text{CDCl}_3$ ) spectrum of compound 1.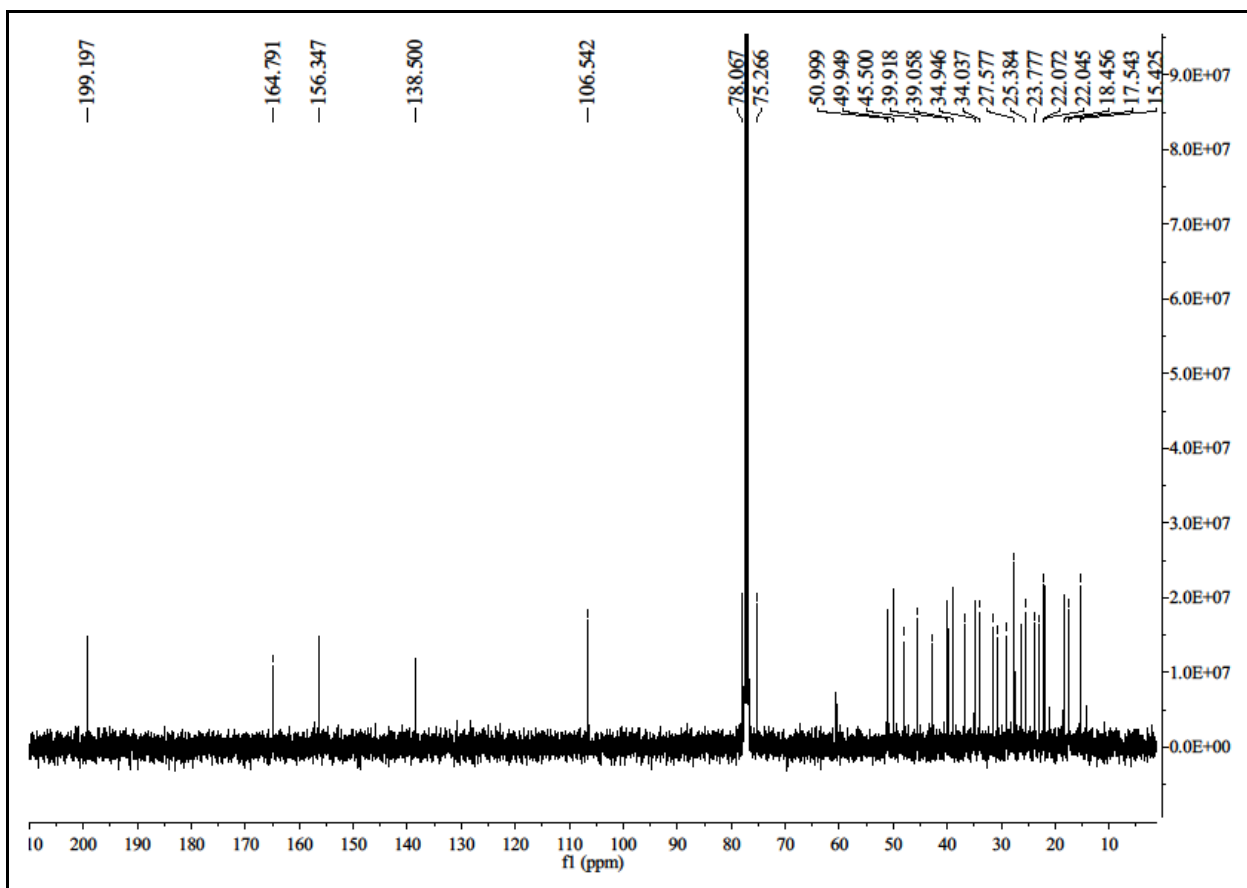**Figure S4.** HMQC ( $\text{CDCl}_3$ ) spectrum of compound 1.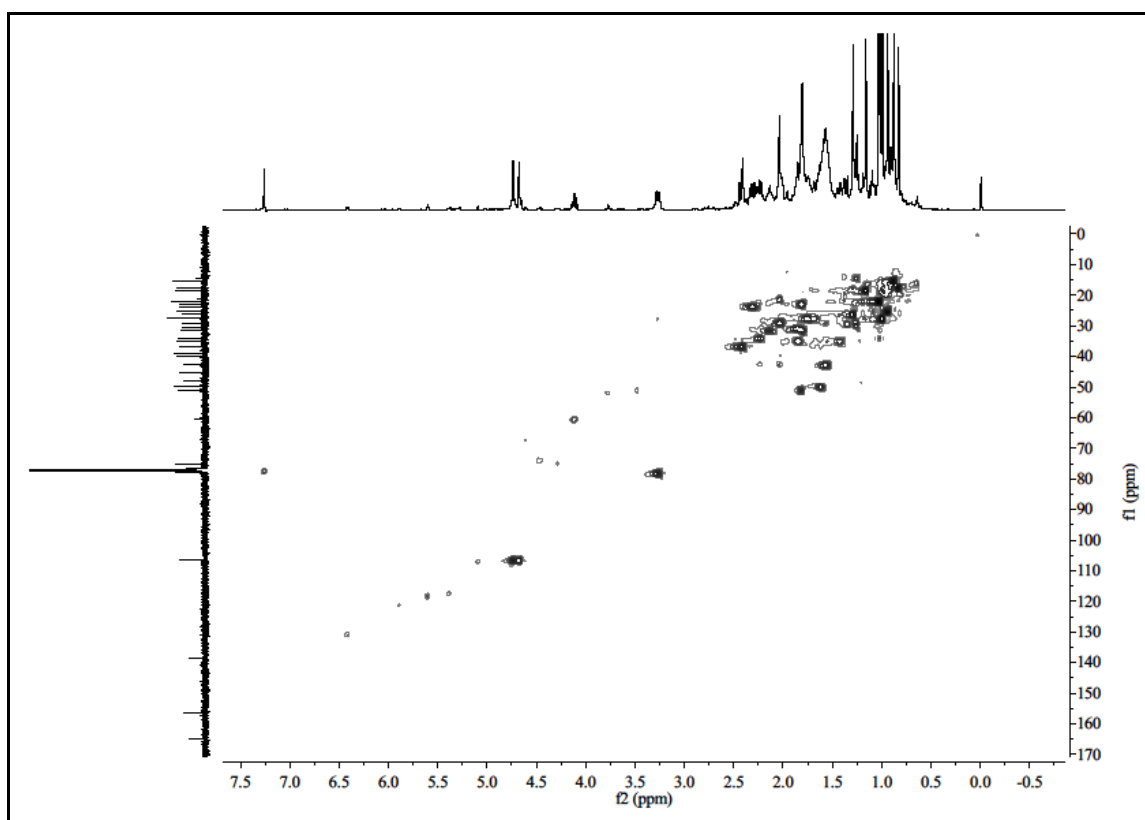

**Figure S5.**  $^1\text{H}$ - $^1\text{H}$  COSY ( $\text{CDCl}_3$ ) spectrum of compound 1.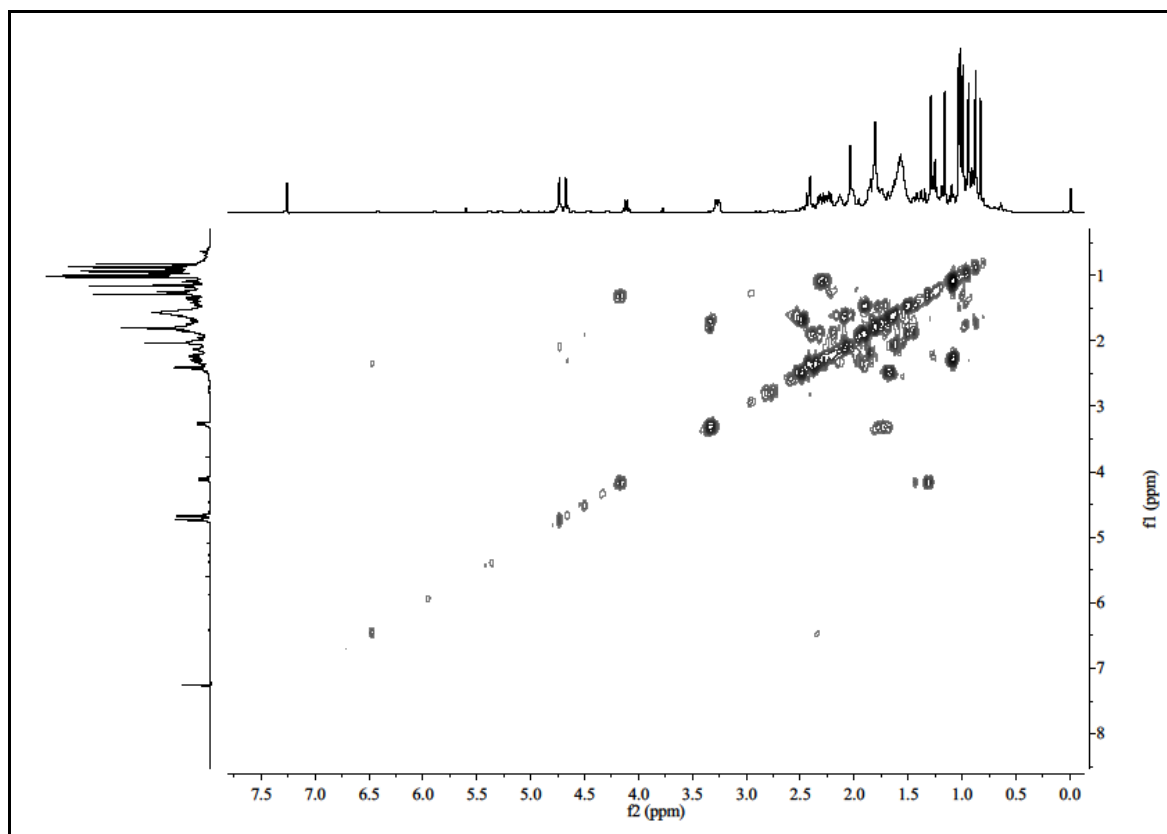**Figure S6.** HMBC spectrum ( $\text{CDCl}_3$ ) of compound 1.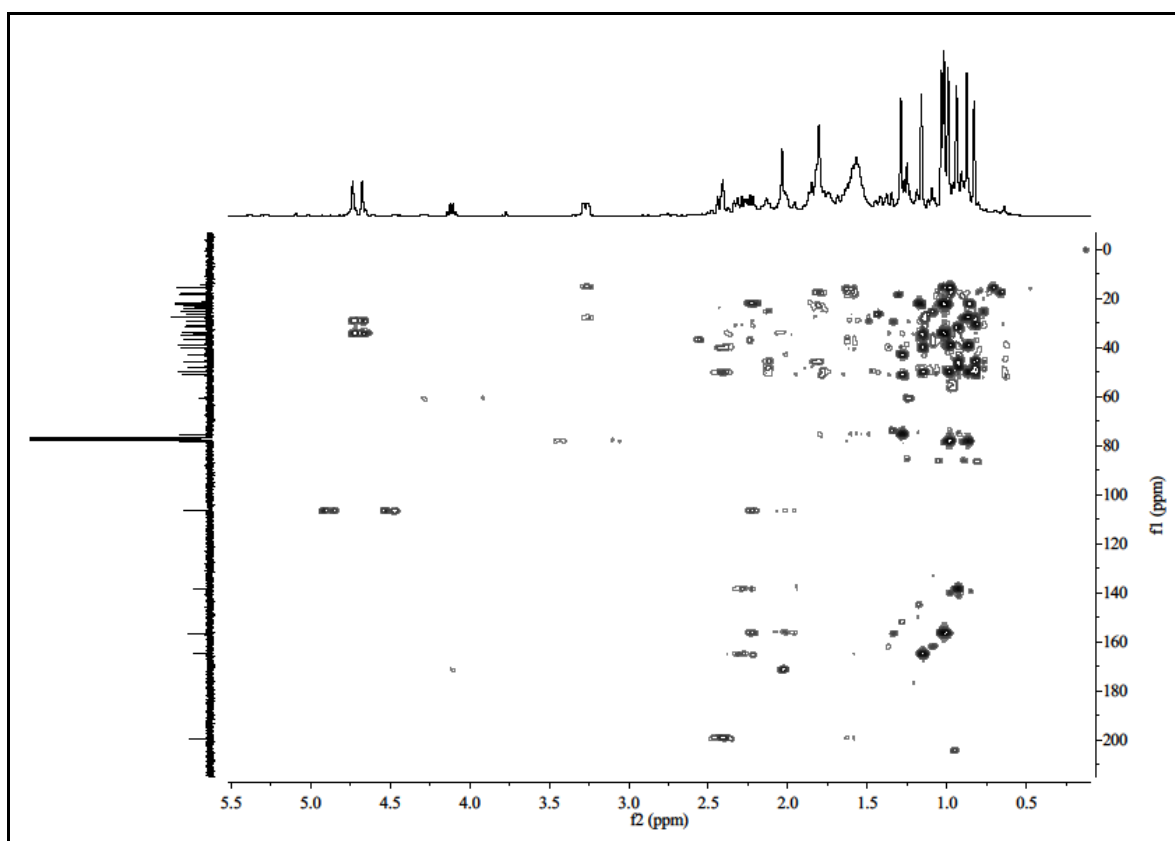

Figure S7. NOESY spectrum of compound 1.

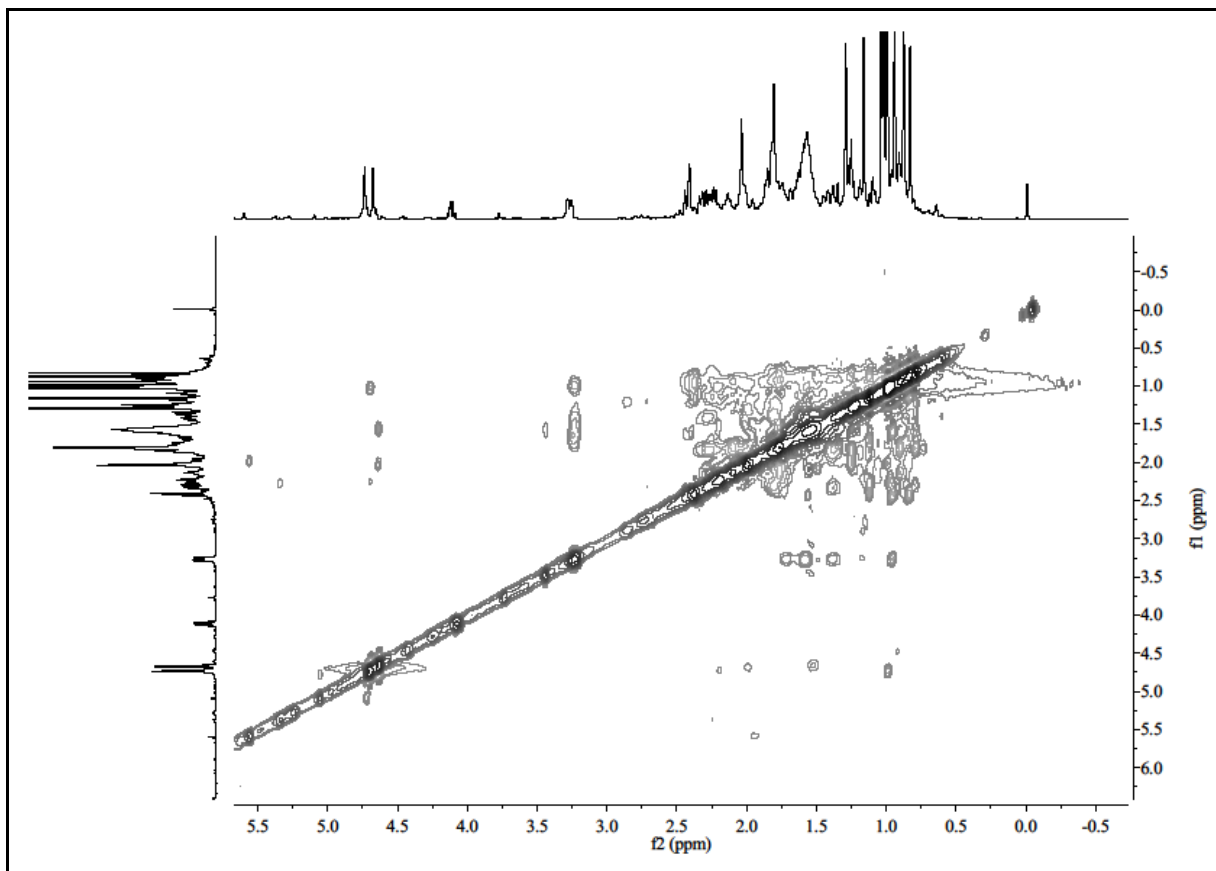

Figure S8. HRESIMS spectrum of compound 1.

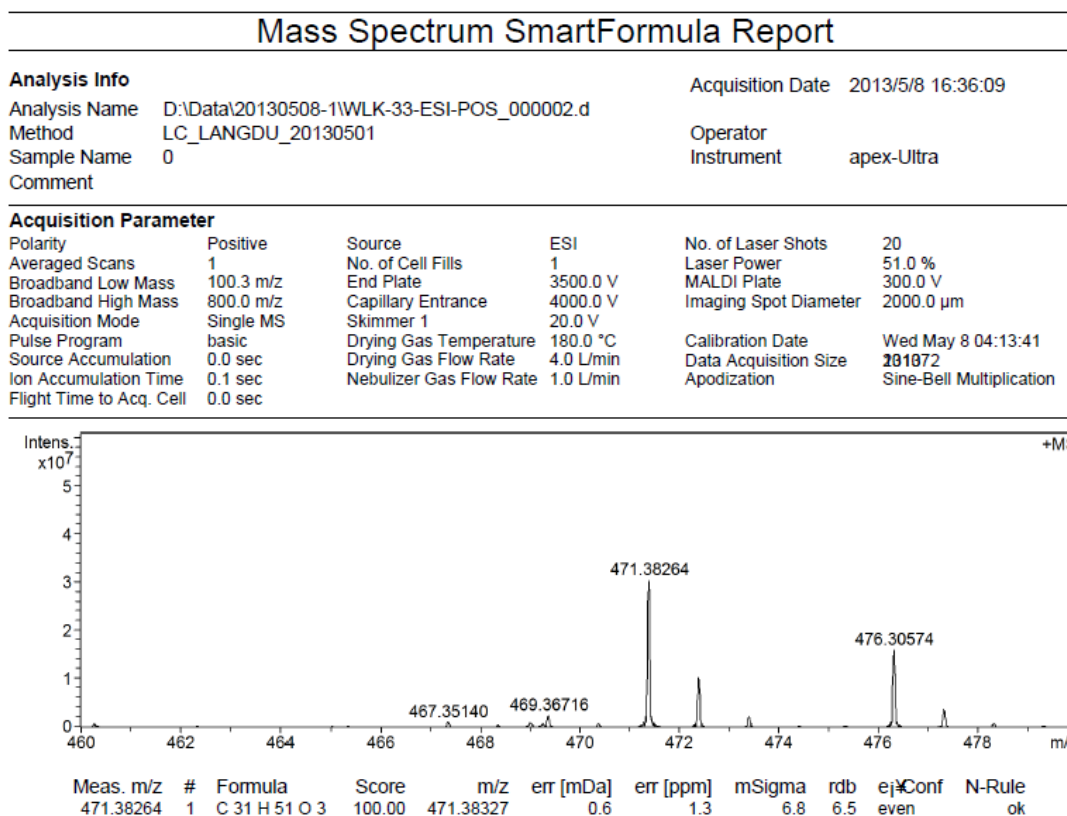

Figure S9. IR spectrum of compound 2.

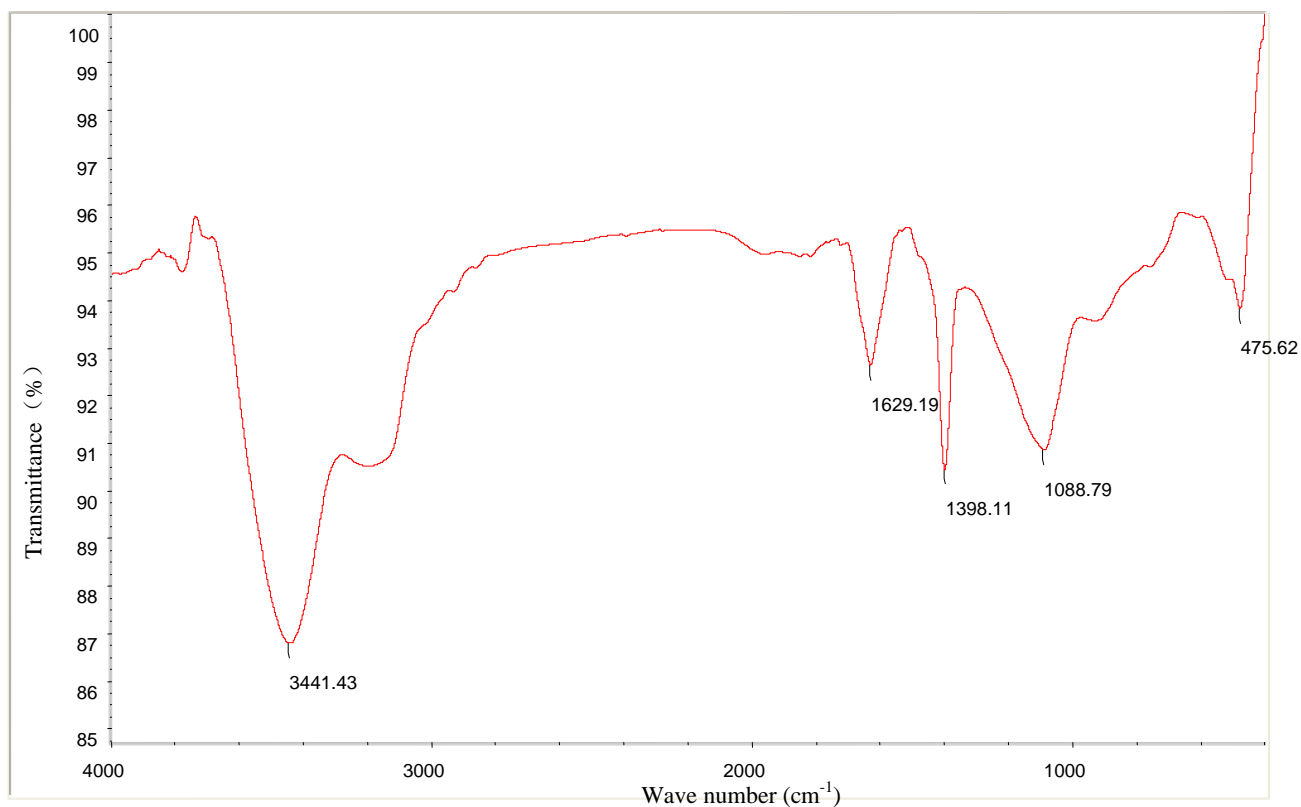Figure S10. <sup>1</sup>H-NMR (400 MHz, CDCl<sub>3</sub>) spectrum of compound 2.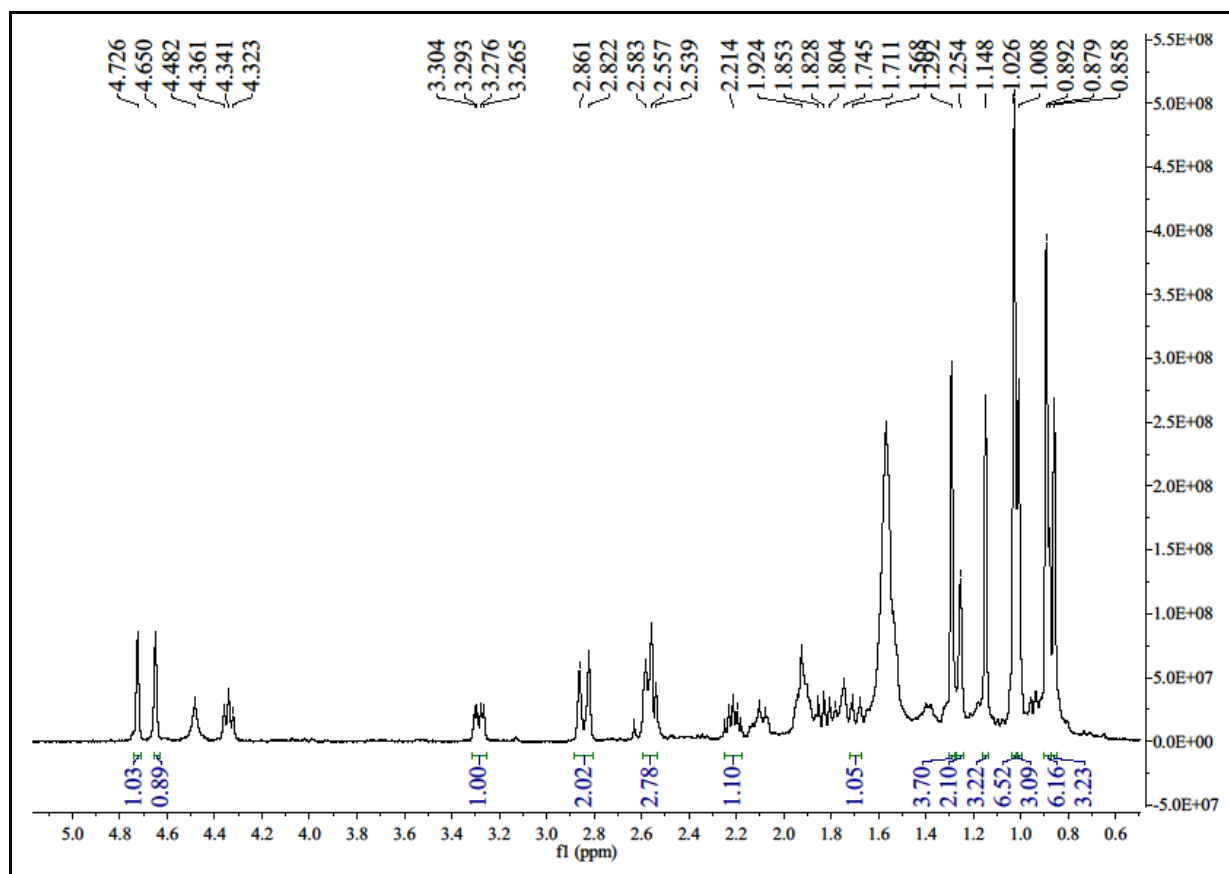

**Figure S11.**  $^{13}\text{C}$ -NMR (100 MHz,  $\text{CDCl}_3$ ) spectrum of compound 2.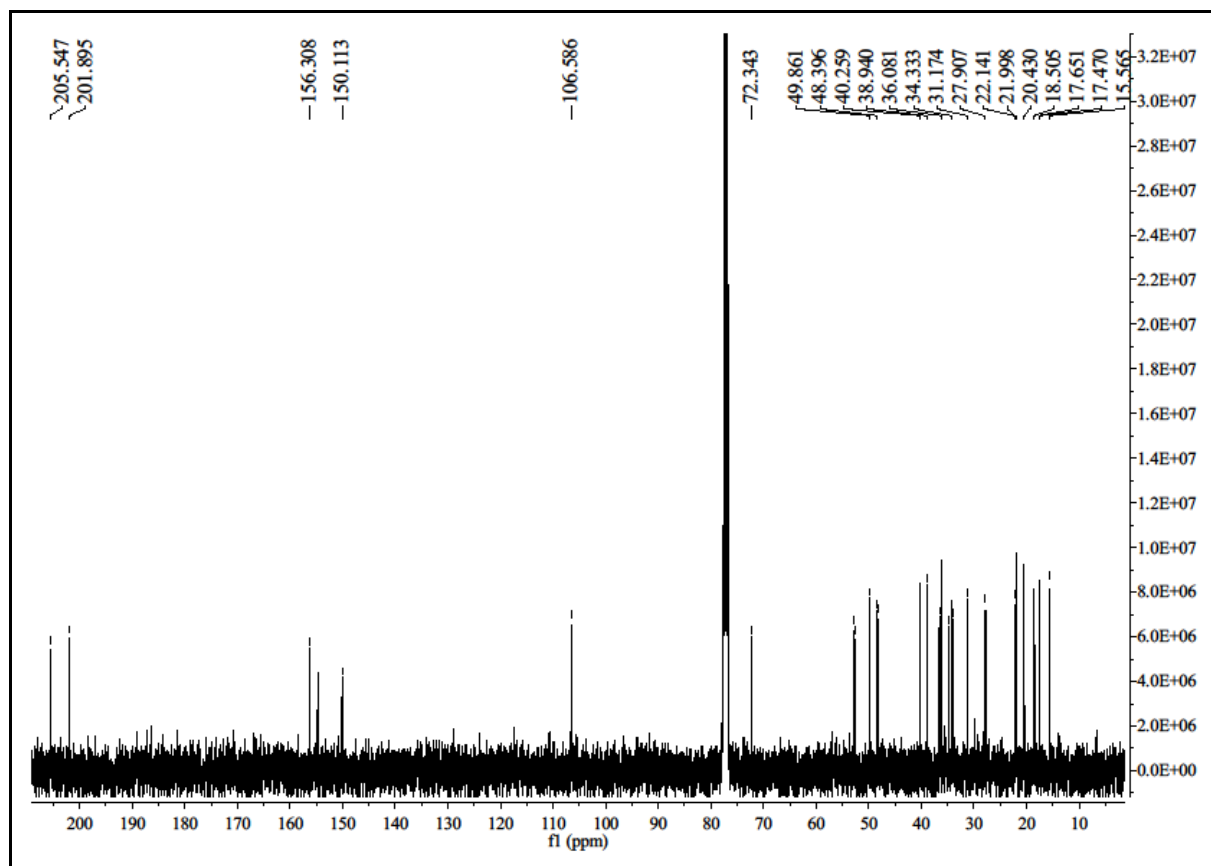**Figure S12.** HMQC ( $\text{CDCl}_3$ ) spectrum of compound 2.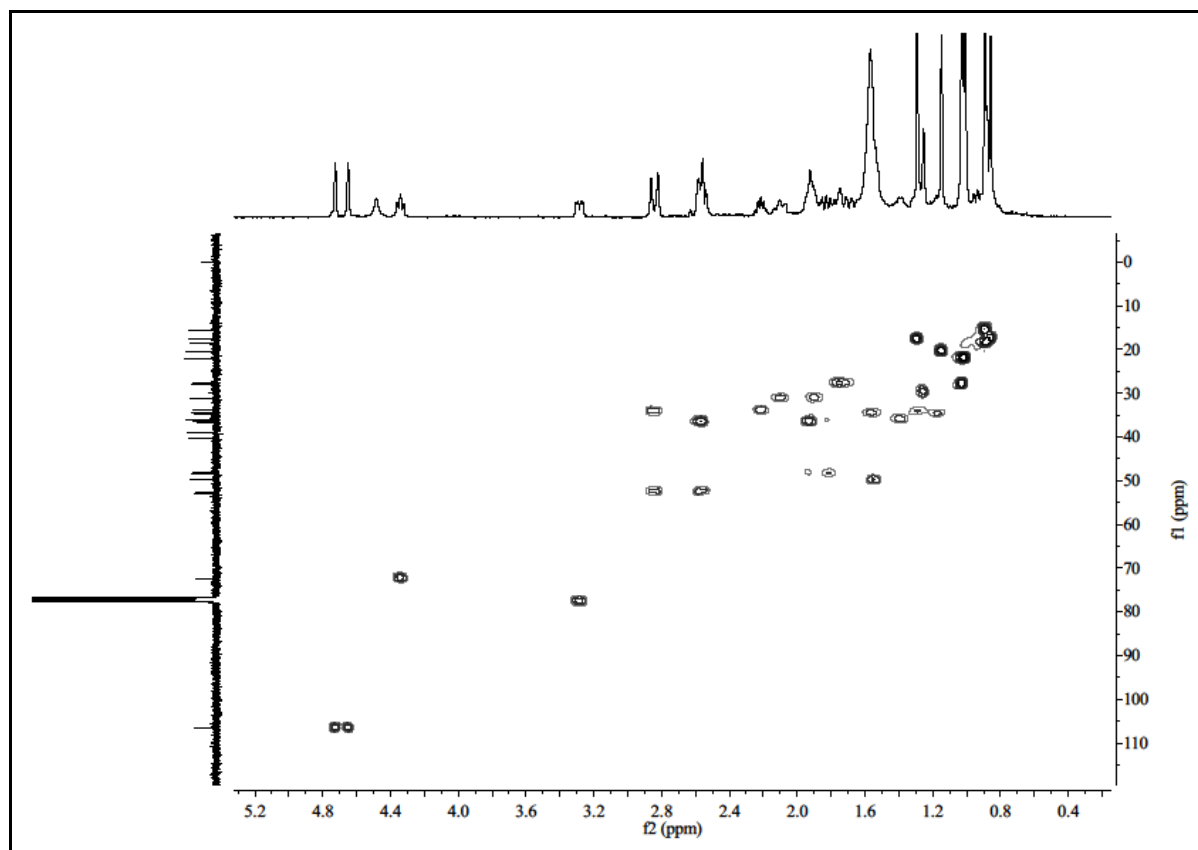

**Figure S13.**  $^1\text{H}$ - $^1\text{H}$  COSY ( $\text{CDCl}_3$ ) spectrum of compound 2.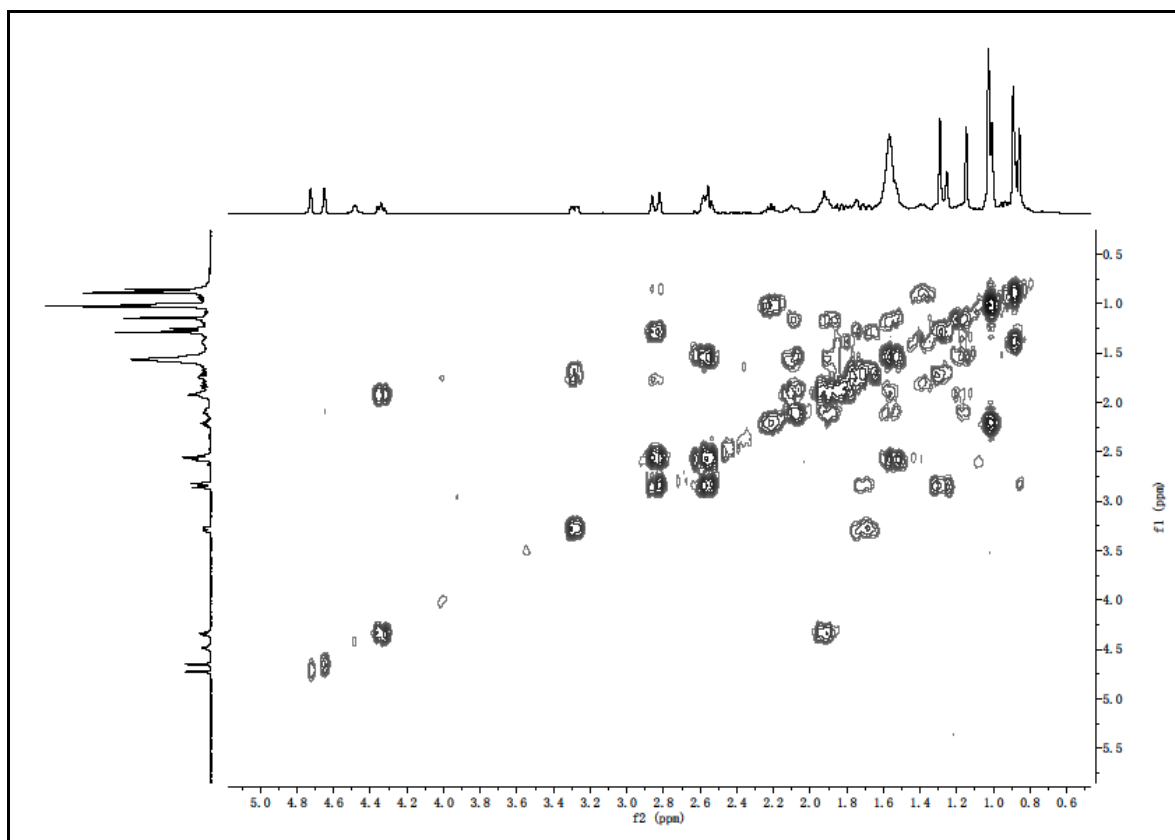**Figure S14.** HMBC ( $\text{CDCl}_3$ ) spectrum of compound 2.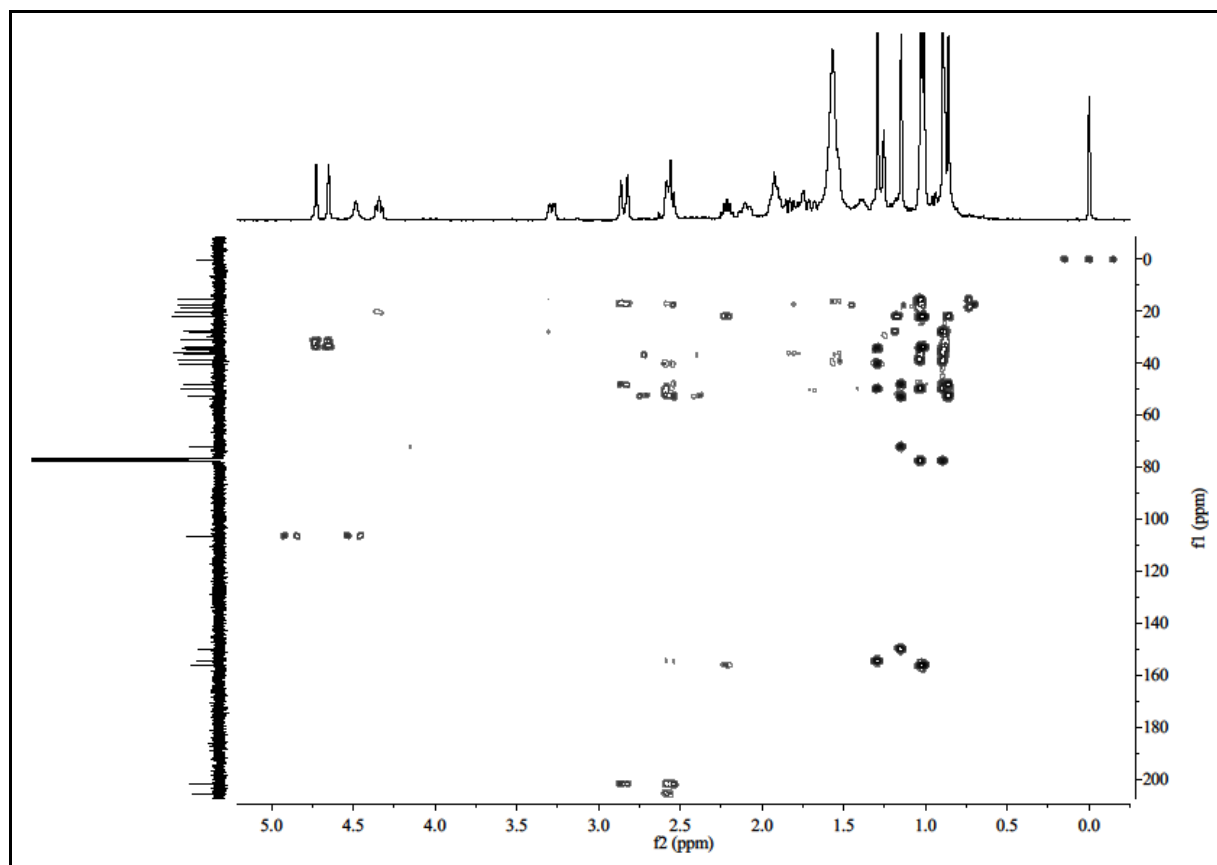

Figure S15. NOESY spectrum of compound 2.

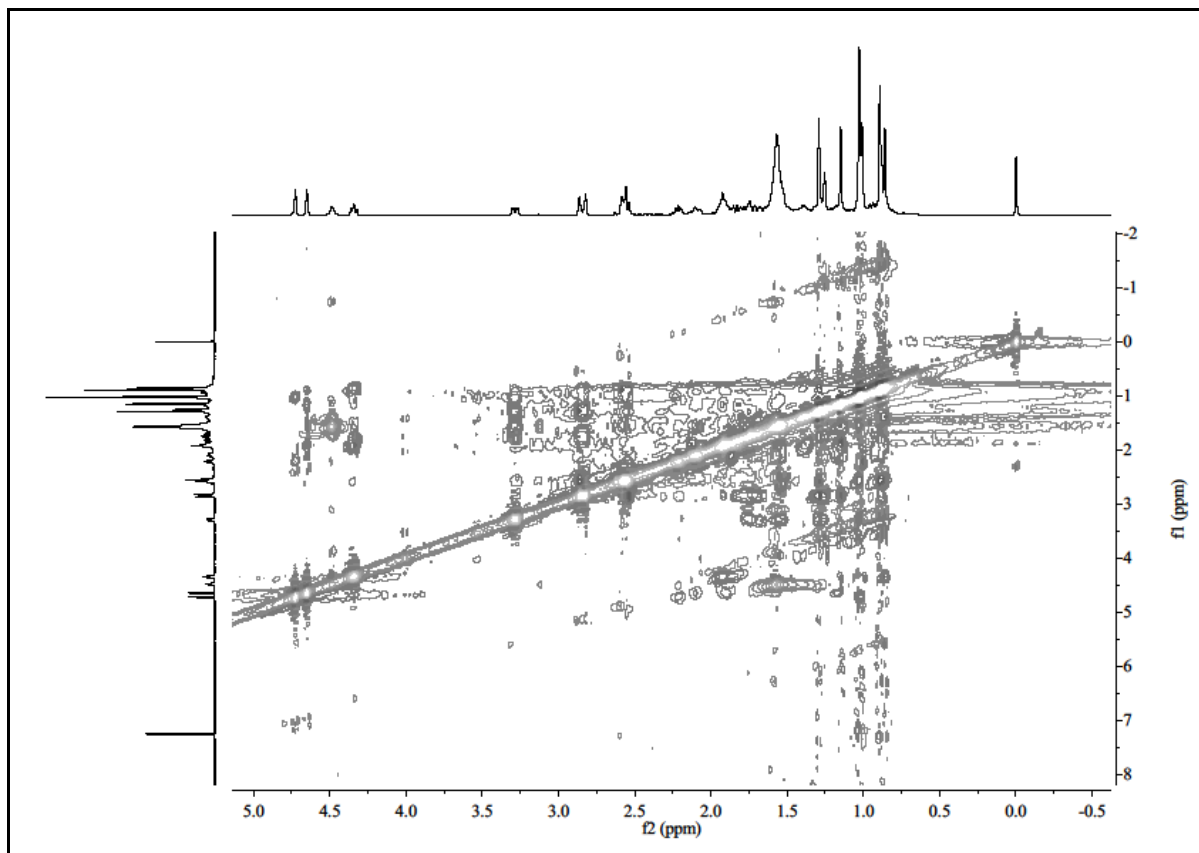

Figure S16. HRESIMS spectrum of compound 2.

### Mass Spectrum SmartFormula Report

| Analysis Info            |                                           | Acquisition Date 2013/5/8 16:32:59 |            |                       |                          |
|--------------------------|-------------------------------------------|------------------------------------|------------|-----------------------|--------------------------|
| Analysis Name            | D:\Data\20130508-1WLK-20-ESI-POS_000002.d | Operator                           |            |                       |                          |
| Method                   | LC_LANGDU_20130501                        | Instrument                         | apex-Ultra |                       |                          |
| Sample Name              | 0                                         |                                    |            |                       |                          |
| Comment                  |                                           |                                    |            |                       |                          |
| Acquisition Parameter    |                                           |                                    |            |                       |                          |
| Polarity                 | Positive                                  | Source                             | ESI        | No. of Laser Shots    | 20                       |
| Averaged Scans           | 1                                         | No. of Cell Fills                  | 1          | Laser Power           | 51.0 %                   |
| Broadband Low Mass       | 100.3 m/z                                 | End Plate                          | 3500.0 V   | MALDI Plate           | 300.0 V                  |
| Broadband High Mass      | 800.0 m/z                                 | Capillary Entrance                 | 4000.0 V   | Imaging Spot Diameter | 2000.0 µm                |
| Acquisition Mode         | Single MS                                 | Skimmer 1                          | 20.0 V     | Calibration Date      | Wed May 8 04:13:41       |
| Pulse Program            | basic                                     | Drying Gas Temperature             | 180.0 °C   | Data Acquisition Size | 201072                   |
| Source Accumulation      | 0.0 sec                                   | Drying Gas Flow Rate               | 4.0 L/min  | Apodization           | Sine-Bell Multiplication |
| Ion Accumulation Time    | 0.1 sec                                   | Nebulizer Gas Flow Rate            | 1.0 L/min  |                       |                          |
| Flight Time to Acq. Cell | 0.0 sec                                   |                                    |            |                       |                          |

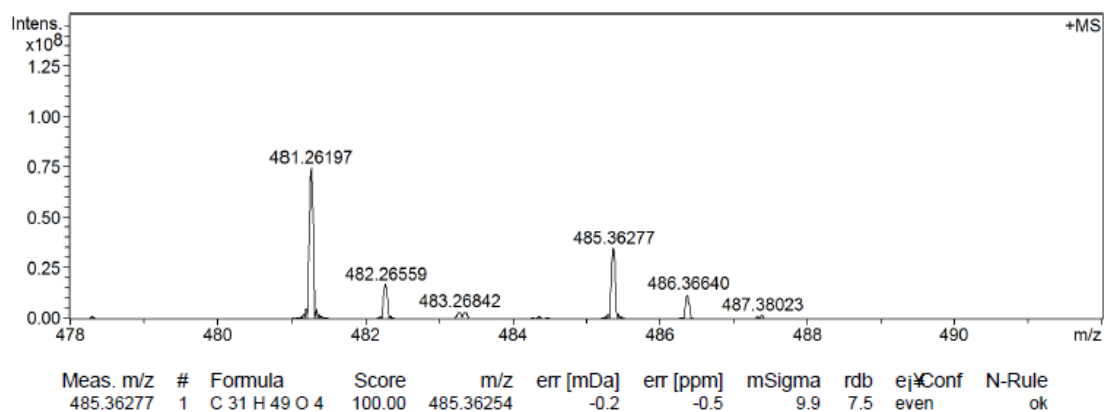

Supplement: molecules-19-07621-s001.pdf [file molecules-19-07621-s001.pdf]
